# Supplementary material for: Fascin-1 expression is associated with neuroendocrine prostate cancer and directly suppressed by androgen receptor
Source: PubMed Central journal article supplement (PMC10703930; doi:10.1038/s41416-023-02449-x), 2023-10-24

# Supplementary Figure S2

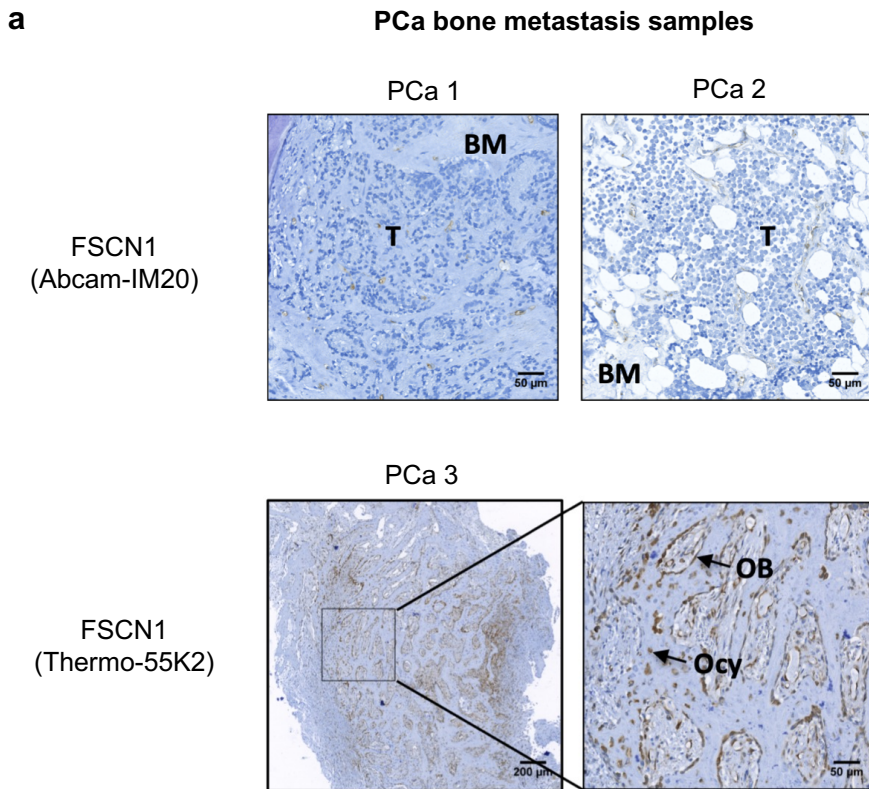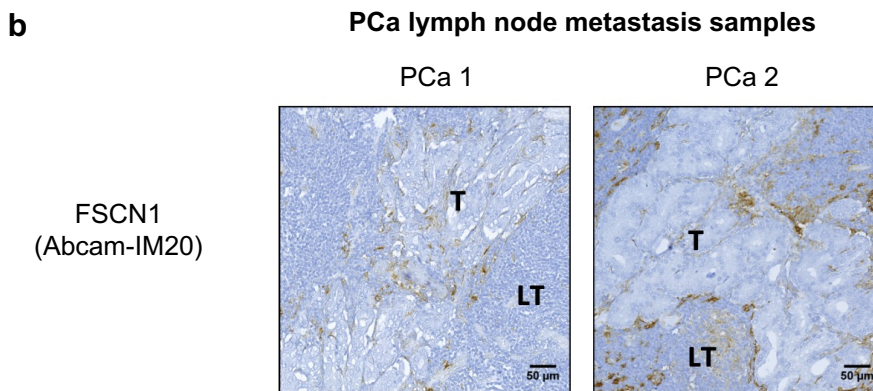

Supplement: 41416_2023_2449_MOESM3_ESM.pdf [file 41416_2023_2449_MOESM3_ESM.pdf]
