# Supplementary material for: Fascin-1 expression is associated with neuroendocrine prostate cancer and directly suppressed by androgen receptor
Source: PubMed Central journal article supplement (PMC10703930; doi:10.1038/s41416-023-02449-x), 2023-10-24

# Supplementary Figure S6

5 kb | hg38

Chr19: 50,855,000 | 50,860,000 |

KLK3

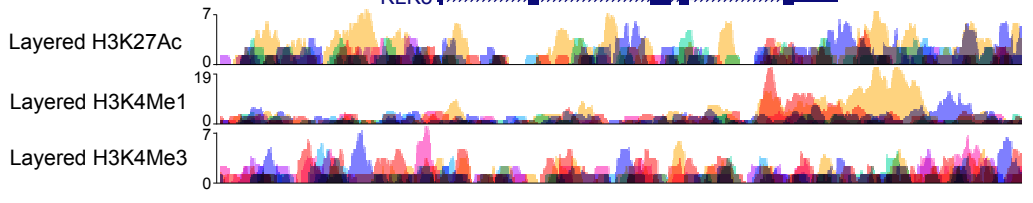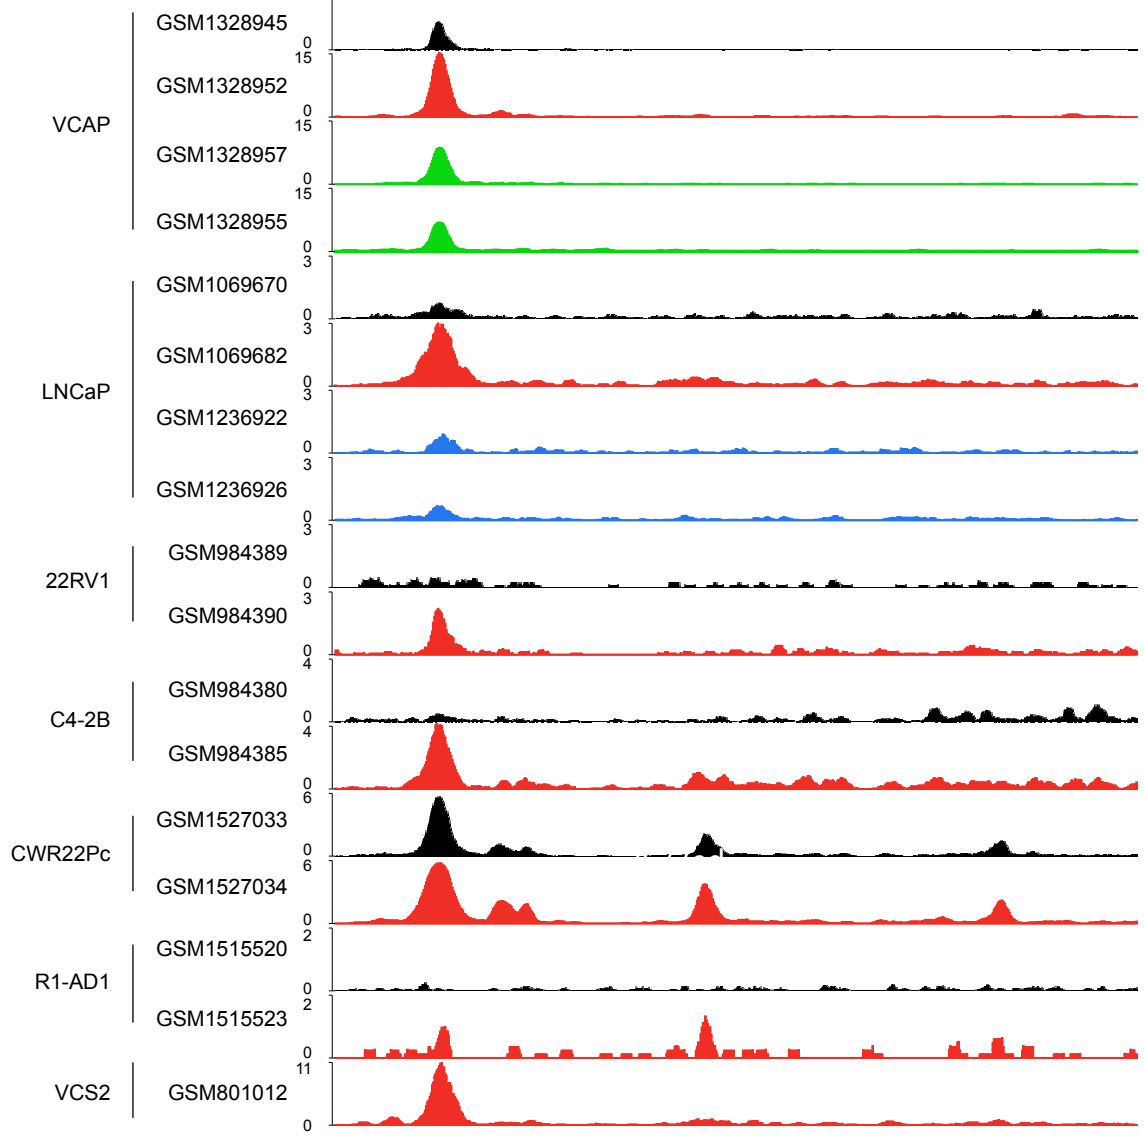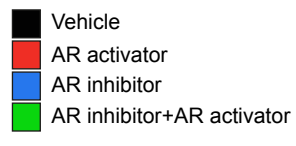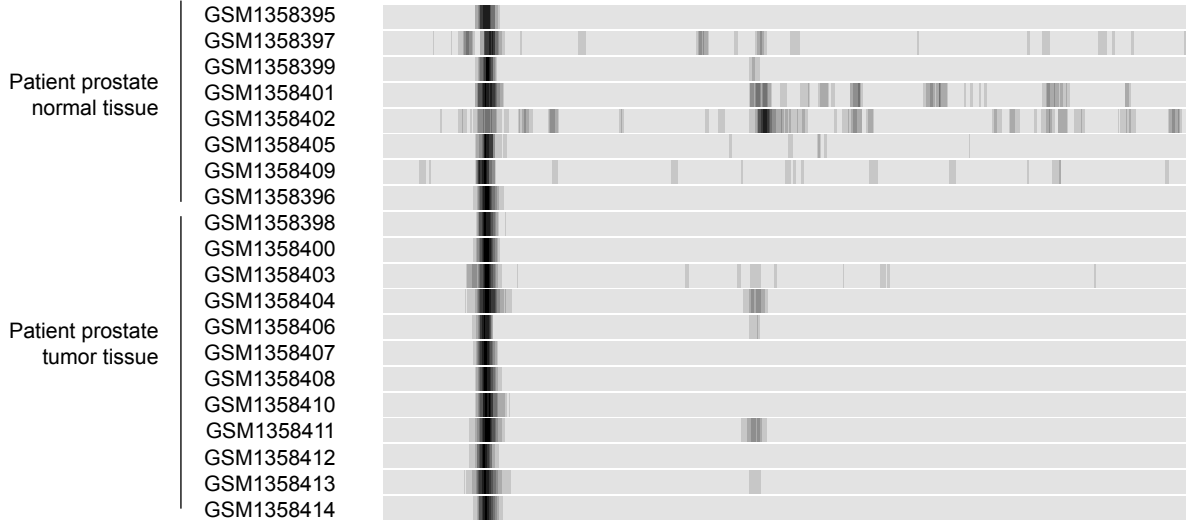

Supplement: 41416_2023_2449_MOESM7_ESM.pdf [file 41416_2023_2449_MOESM7_ESM.pdf]
