# Supplementary material for: Fascin-1 expression is associated with neuroendocrine prostate cancer and directly suppressed by androgen receptor
Source: PubMed Central journal article supplement (PMC10703930; doi:10.1038/s41416-023-02449-x), 2023-10-24

# Supplementary Figure S7

10 kb | hg38

Chr7: 5,585,000 | 5,590,000 | 5,595,000 | 5,600,000 | 5,605,000 | 5,610,000 |

FSCN1

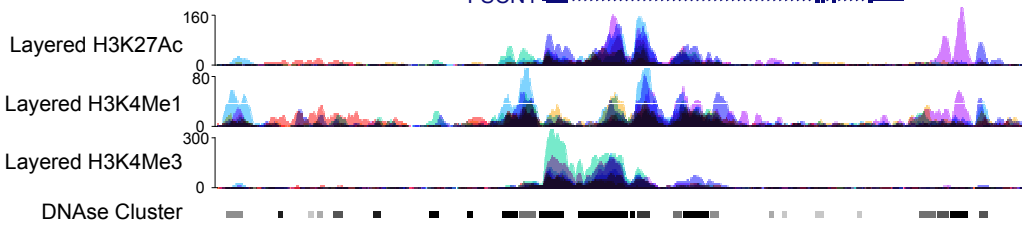

AR ChIP-seq  
FOXA1 ChIP-seq

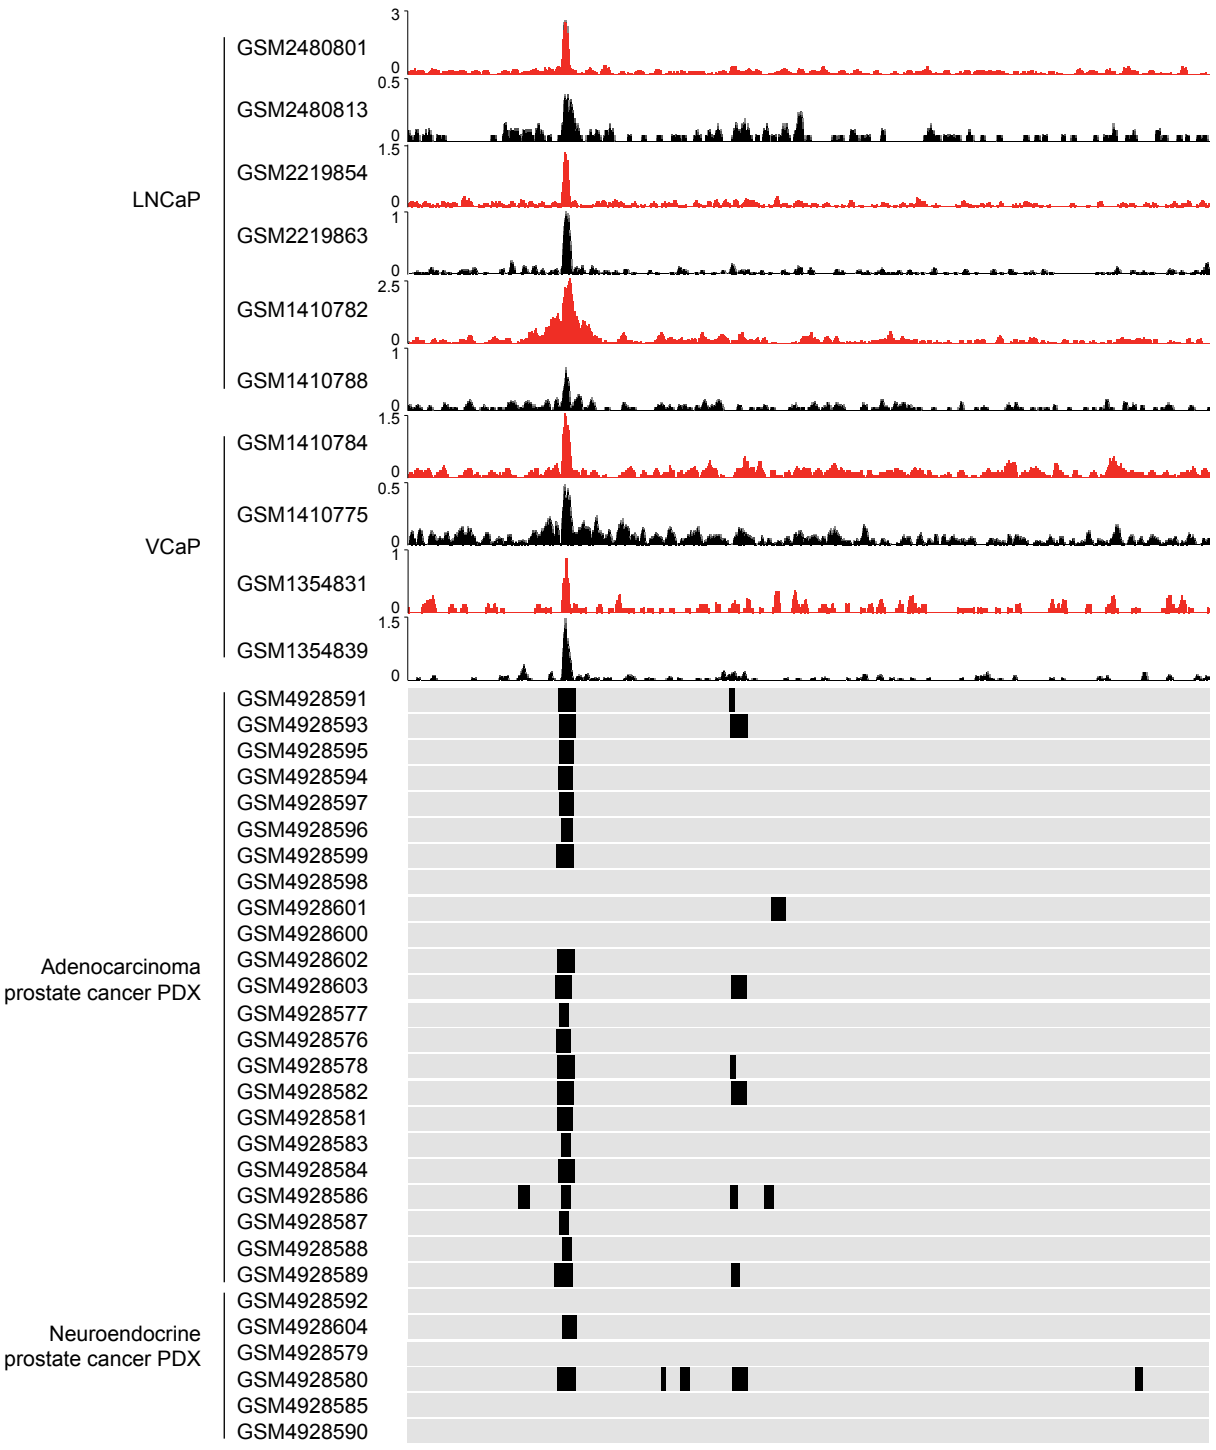

Supplement: 41416_2023_2449_MOESM8_ESM.pdf [file 41416_2023_2449_MOESM8_ESM.pdf]
