# Supplementary material for: Fascin-1 expression is associated with neuroendocrine prostate cancer and directly suppressed by androgen receptor
Source: PubMed Central journal article supplement (PMC10703930; doi:10.1038/s41416-023-02449-x), 2023-10-24
Supplement: 41416_2023_2449_MOESM11_ESM.pdf [file 41416_2023_2449_MOESM11_ESM.pdf]

| Quantitative PCR Primers |         |                           |
|--------------------------|---------|---------------------------|
| Gene Name                |         | Sequence (5'-3')          |
| CHGA                     | Forward | GCGGTGGAAGAGCCATCAT       |
|                          | Reverse | TCTGTGGCTTCACCACTTTTCTC   |
| ENO2                     | Forward | AGTTGCCCTGCCTTAC          |
|                          | Reverse | GAGACAAACAGCGTTACTTAG     |
| SYP                      | Forward | TGGGGACTACTCCTCGTCAG      |
|                          | Reverse | CACATGAAGGCGAACACAGC      |
| SOX2                     | Forward | CATGGGTTCGGTGGTCAAG       |
|                          | Reverse | TGATCATGTCCCGGAGGT        |
| BRN2                     | Forward | ACACTGACCGATCTCCACGCAGTA  |
|                          | Reverse | GAGGGTGTGGGACCCTAAATATGAC |
| FSCN1                    | Forward | AAAAGTGTGCCTTCCGTACC      |
|                          | Reverse | CCCATTCTTCTTGAGGTCA       |
| AR                       | Forward | GCCTTGCTCTCTAGCCTCAA      |
|                          | Reverse | GTCGTCCACGTGTAAGTTGC      |
| KLK3                     | Forward | AGTGCGAGAAGCATTCCCAAC     |
|                          | Reverse | CCAGCAAGATCACGCTTTTGTT    |
| GAPDH                    | Forward | AAGGTCCGAGTCAACGGAATT     |
|                          | Reverse | CTCCTGGAAGATGGTATGG       |
| L32                      | Forward | CAAGGAGCTGGAAGTGCTGC      |
|                          | Reverse | CAGCTCTTCCACGATGGCT       |

**Supplementary Table 1**
