# Supplementary material for: Fascin-1 expression is associated with neuroendocrine prostate cancer and directly suppressed by androgen receptor
Source: PubMed Central journal article supplement (PMC10703930; doi:10.1038/s41416-023-02449-x), 2023-10-24
Supplement: 41416_2023_2449_MOESM12_ESM.pdf [file 41416_2023_2449_MOESM12_ESM.pdf]

| Chromatin-Immunoprecipitation-Quantitative PCR (ChIP-qPCR) Primers |         |                       |
|--------------------------------------------------------------------|---------|-----------------------|
|                                                                    |         | Séquence (5'-3')      |
| a                                                                  | Forward | GGTGGAGGTCGTAGCATTGT  |
|                                                                    | Reverse | AGTAGAGACGGGGTTTTGCC  |
| b                                                                  | Forward | ATCGGTCAGAACAGTGCTCG  |
|                                                                    | Reverse | TGGATTCAGGCATGCACCA   |
| c                                                                  | Forward | GGCAAACCCCGTCTCTACT   |
|                                                                    | Reverse | CAGCAAGGTGAATTGGAGCAC |
| d                                                                  | Forward | CAAGATTGTACCACCGCCCC  |
|                                                                    | Reverse | CTCCTCCCTGAACCACCTCT  |
| e                                                                  | Forward | ACGTCACTATGAGCCACCAC  |
|                                                                    | Reverse | ATCCTGCTTTCCTGAGGGC   |
| Prom KLK3                                                          | Forward | TGGGACAACCTTGCAAACCTG |
|                                                                    | Reverse | CCAGAGTAGGTCTGTTTTCAA |
| Control region                                                     | Forward | CCTGGAGGGCTTGAGAT     |
|                                                                    | Reverse | ATCCTACGGCTGGCTGTGA   |

**Supplementary Table 2**
