# Supplementary material for: Fascin-1 expression is associated with neuroendocrine prostate cancer and directly suppressed by androgen receptor
Source: PubMed Central journal article supplement (PMC10703930; doi:10.1038/s41416-023-02449-x), 2023-10-24
Supplement: 41416_2023_2449_MOESM13_ESM.pdf [file 41416_2023_2449_MOESM13_ESM.pdf]

| PCA samples | Histology                                                            | Gleason score | TNM Stage* |    |     | Metastatic status at biopsy | Pre-biopsy PSA (ng/mL)** | Abiraterone prior to biopsy | Enzalutamide prior to biopsy | LHRH agonist/LHRH antagonist prior to biopsy |
|-------------|----------------------------------------------------------------------|---------------|------------|----|-----|-----------------------------|--------------------------|-----------------------------|------------------------------|----------------------------------------------|
|             |                                                                      |               | T          | N  | M   |                             |                          |                             |                              |                                              |
| NEPC-1      | Small cell neuroendocrine carcinoma                                  | NA            | T4         | N1 | M1b | Yes (bone)                  | 3.4                      | No                          | No                           | No                                           |
| NEPC-2      | Small cell neuroendocrine carcinoma                                  | NA            | T4         | N1 | M1c | Yes (liver)                 | 0.3                      | No                          | No                           | Yes (hormono-radiotherapy >10 years ago)     |
| NEPC-3      | Small cell neuroendocrine carcinoma                                  | NA            | T3b        | N1 | M1b | Yes (bone)                  | 33                       | No                          | No                           | No                                           |
| NEPC-4      | Poorly differentiated adenocarcinoma with neuroendocrine contingent. | 9 (4+5)       | T3a        | N1 | M1  | Yes (bone)                  | 2,6                      | No                          | No                           | Yes (1 month)                                |

**Supplementary Table 3: Histo-pathological Characterization of NEPC samples (n=6)**

PSA: prostate specific antigen, NA : not available

\*According to AJCC-TNM

\*\*According to the patients' laboratory standards

### Supplementary Table 3
